# Supplementary material
Source: publisher figshare collection journal article supplement (https://tandf.figshare.com/articles/dataset/_/12853504)
Supplement: Supplementary file 1 [file 1]

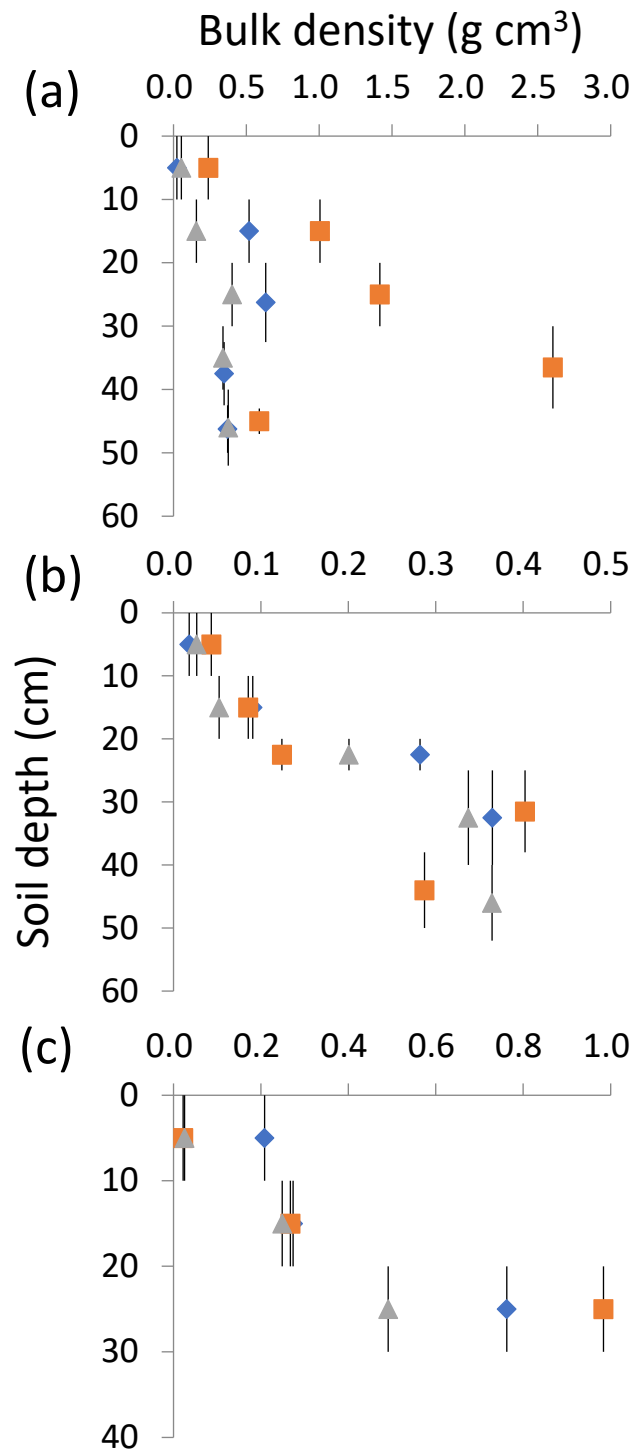

Supplemental Figure S3. Vertical profiles of soil bulk density under (a) dry mound and (b) *Sphagnum* moss-wet and (c) sedge depression zones measured in 2011. Triplicate data are independently shown for each vegetation using the same symbols as Figure S2. The mean depth and depth range of soil samples were indicated by the plot and error bar.
