# Supplementary material
Source: publisher figshare collection journal article supplement (https://tandf.figshare.com/articles/dataset/_/12853504)
Supplement: Supplementary file 2 [file 1]

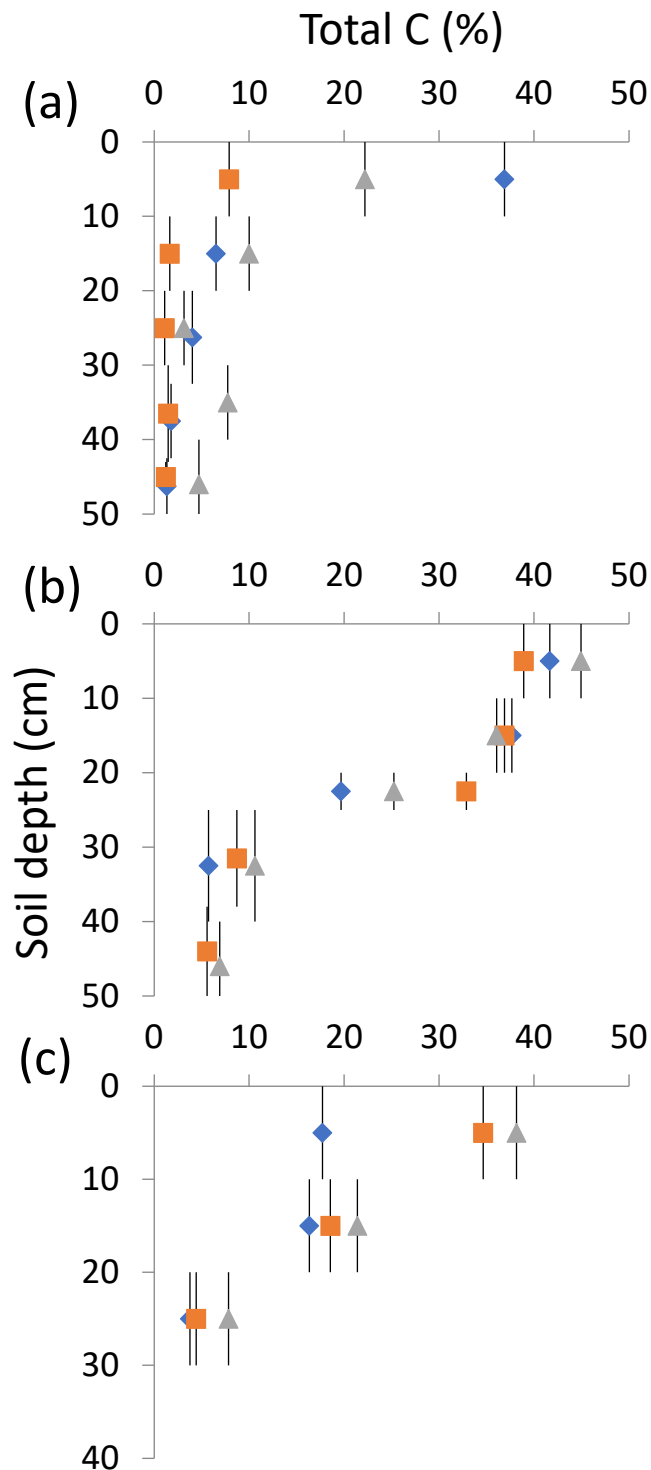

Supplemental Figure S2. Vertical profiles of soil carbon content under (a) dry mound and (b) *Sphagnum* moss-wet and (c) sedge depression zones measured in 2011. Triplicate data are independently shown for each vegetation. The mean depth and depth range of soil samples were indicated by the plot and error bar. Soil carbon content was analyzed at the Far East Geological Institute, Far East Branch, Russian Academy of Sciences, Vladivostok, Russia using a MAT 253 isotope ratio mass spectrometer (Thermo Fisher Scientific, Bremen, Germany).
